# Supplementary material for: Structural, mechanical, electronic and optical properties of biphenylene hydrogenation: a first-principles study
Source: Royal Society of Chemistry journal article supplement (doi:10.1039/d3cp03052k), 2023-01-01
Supplement: d3cp03052k1.pdf [file d3cp03052k1.pdf]

# Structural, Mechanical, Electronic and Optical Properties of Biphenylene Hydrogenation: A First-Principles Study

Kai Chen<sup>a</sup>, Jian Zhou<sup>a</sup>, Wuyan Zhao<sup>a</sup>, Riyi Yang<sup>a</sup>, Chong Qiao<sup>b</sup>, Wan-Sheng Su<sup>c,d,e,\*</sup>, Yuxiang Zheng<sup>a,e</sup>, Rongjun Zhang<sup>a,e</sup>, Liangyao Chen<sup>a</sup>, Songyou Wang<sup>a,,e,f \*</sup>

<sup>a</sup>Shanghai Ultra-Precision Optical Manufacturing Engineering Center, Department of Optical Science and Engineering, Fudan University, Shanghai 200433, China.

<sup>b</sup>School of Mathematics and Physics, Nanyang Institute of Technology, Nanyang 473004, China

<sup>c</sup>National Taiwan Science Education Center, Taipei 111081, Taiwan

<sup>d</sup>Department of Electro-Optical Engineering, National Taipei University of Technology, Taipei 106344, Taiwan

<sup>e</sup>Department of Physics, National Sun Yat-sen University, Kaohsiung 804201, Taiwan

<sup>f</sup>Yiwu Research Institute of Fudan University, Chengbei Road, Yiwu City, 322000 Zhejiang, China

<sup>g</sup>Key Laboratory for Information Science of Electromagnetic Waves (MoE), Shanghai 200433, China

\*Email: [wssu@mail.ntsec.gov.tw](mailto:wssu@mail.ntsec.gov.tw); [songyouwang@fudan.edu.cn](mailto:songyouwang@fudan.edu.cn)

## Supporting Information

The carbon-carbon band length of  $\alpha$ ,  $\beta$  and  $\gamma$  configurations numbered in Fig. 1 are shown in Table S1.

**Table S1** The carbon-carbon band length of  $\alpha$ ,  $\beta$  and  $\gamma$  configurations

|                        | Band length(Å)   |                  |                  |                  |                  |                  |
|------------------------|------------------|------------------|------------------|------------------|------------------|------------------|
| Biphenylene            | $d_1 = 1.448$    | $d_2 = 1.407$    |                  | $d_3 = 1.457$    | $d_4 = 1.456$    |                  |
| Configuration $\alpha$ | $d_5 = 1.573$    | $d_6 = 1.566$    |                  | $d_7 = 1.541$    | $d_8 = 1.579$    |                  |
| Configuration $\beta$  | $d_9 = 1.574$    | $d_{10} = 1.514$ | $d_{11} = 1.557$ | $d_{12} = 1.532$ | $d_{13} = 1.591$ | $d_{14} = 1.359$ |
| Configuration $\gamma$ | $d_{15} = 1.502$ | $d_{16} = 1.500$ |                  | $d_{17} = 1.519$ | $d_{18} = 1.541$ |                  |

Refractive index  $n$ , extinction coefficient  $k$ , absorption coefficient  $\alpha$ , transmittance  $T$ , reflectivity  $R$ , optical conductivity  $\sigma$  and energy-loss function  $L$  of  $\alpha$ ,  $\beta$  and  $\gamma$  configurations are plotted in Fig. S1.

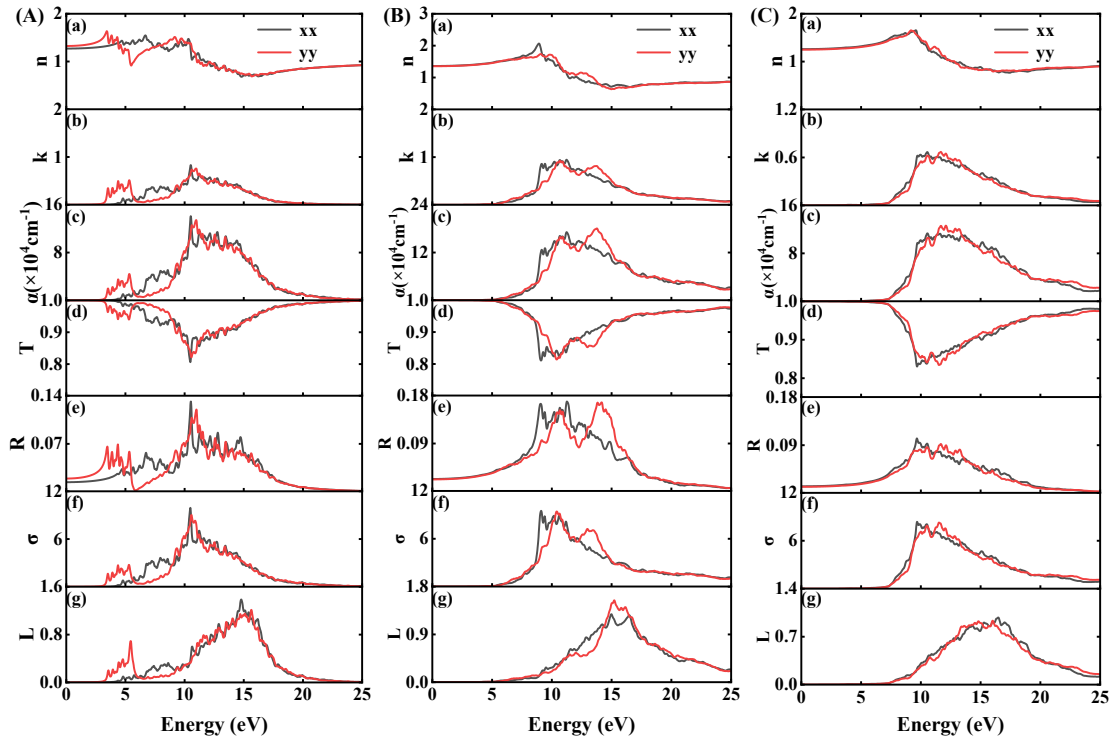

**Fig. S1** The calculated optical properties of  $\alpha$  (left panel),  $\beta$  (middle panel) and  $\gamma$  (right panel) configurations. There are two different directions of light polarization, xx and yy directions. (a) Refractive index  $n$ , (b) extinction coefficient  $k$ , (c) absorption coefficient  $\alpha$ , (d) transmittance  $T$ , (e) reflectivity  $R$ , (f) optical conductivity  $\sigma$ , and (g) energy-loss function  $L$ .
